# Supplementary material
Source: PubMed Central journal article supplement (PMC3292364)
Supplement: 11-8441_z7g999112354st1.pdf [file 11-8441_z7g999112354st1.pdf]

## SUPPLEMENTARY MATERIALS

| <b>Materials</b>                                     | <b>Sources</b>               | <b>Concentration</b>                                          |
|------------------------------------------------------|------------------------------|---------------------------------------------------------------|
| Dulbecco's modified Eagle's Medium (DMEM)            | Invitrogen, Grand Island, NY | DMEM/F-12 (1:1)                                               |
| F-12 nutrient mixture (F-12)                         | Invitrogen, Grand Island, NY | DMEM/F-12 (1:1)                                               |
| Knockout Serum Replacement                           | Invitrogen, Grand Island, NY | 10%                                                           |
| Fetal Bovine Serum (FBS)                             | Invitrogen, Grand Island, NY | 5%                                                            |
| Newborn Calf Serum                                   | Invitrogen, Grand Island, NY | 10%                                                           |
| Human Fibroblast Growth Factor-Basic                 | Invitrogen, Grand Island, NY | 4 ng/ml                                                       |
| Leukemia inhibitory factor (LIF)                     | Invitrogen, Grand Island, NY | 10 ng/ml                                                      |
| Dimethyl Sulfoxide                                   | Sigma-Aldrich, St. Louis, MO | 0.5%                                                          |
| Cholera Toxin                                        | Sigma-Aldrich, St. Louis, MO | 1 nM                                                          |
| Hydrocortisone                                       | Sigma-Aldrich, St. Louis, MO | 5 µg/ml                                                       |
| Insulin-Transferrin-sodium selenite media supplement | Roche, Indianapolis, IN      | 5 µg/ml insulin, 5 µg/ml Transferrin, 5 ng/ml sodium selenite |
| Human Epithelial Growth factor (EGF)                 | Invitrogen, Grand Island, NY | 10 ng/ml                                                      |
| Mitomycin C                                          | Roche, Indianapolis, IN      | 4 µg/ml                                                       |
| Hank's Balanced Salt Solutions (HBSS)                | Invitrogen, Grand Island, NY | 1 x                                                           |
| Phosphate-Buffered Saline pH7.4 (PBS)                | Invitrogen, Grand Island, NY | 1 x                                                           |
| Amphotericin B                                       | Invitrogen, Grand Island, NY | 50 µg/ml                                                      |
| Gentamicin                                           | Invitrogen, Grand Island, NY | 1.25 µg/ml                                                    |
| Dispase II                                           | Roche, Indianapolis, IN      | 10 mg/ml                                                      |
| Collagenase A                                        | Roche, Indianapolis, IN      | 1 mg/ml                                                       |
| 5-ethynyl-2'-deoxyuridine (EdU)                      | Invitrogen, Eugene, OR       | 10 µM                                                         |
| Qdot <sup>®</sup> nanocrystals (Qtracker)            | Invitrogen, Eugene, OR       | 10 nM                                                         |
| Matrigel <sup>™</sup> Basement Membrane Matrix       | BD Biosciences               | 50%                                                           |
| Trypsin and EDTA (T/E)                               | Invitrogen, Grand Island, NY | 0.25% and 1 mM                                                |

| <b>Table 2: Antibodies Used for Immunofluorescence Staining (IF) and Western Blotting (WB)</b> |                               |                 |
|------------------------------------------------------------------------------------------------|-------------------------------|-----------------|
| <b>Antibodies</b>                                                                              | <b>Sources</b>                | <b>Dilution</b> |
| Cytokeratin 12 (L-20)                                                                          | Santa Cruz (Santa Cruz, CA)   | 1:500           |
| p63 $\alpha$                                                                                   | Cell Signaling (Danvers, MA)  | 1:1000          |
| Pan-cytokeratins (AE1/AE3) (PCK)                                                               | Dako (Carpinteria, CA)        | 1:50            |
| Oct4                                                                                           | Millipore (Billerica, MA)     | 1:100           |
| Nanog                                                                                          | Abcam (Cambridge, MA)         | 1:100           |
| Sox2                                                                                           | Abcam (Cambridge, MA)         | 1:100           |
| Rex1                                                                                           | Abcam (Cambridge, MA)         | 1:100           |
| CD34                                                                                           | Abcam (Cambridge, MA)         | 1:100           |
| N-cadherin                                                                                     | Santa Cruz (Santa Cruz, CA)   | 1:50            |
| Vimentin (SP20)                                                                                | Abcam (Cambridge, MA)         | 1:100           |
| $\beta$ -actin                                                                                 | Sigma-Aldrich (St. Louis, MO) | 1: 5000         |
| Alexa Fluor 488 anti–mouse IgG                                                                 | Invitrogen (Carlsbad, CA)     | 1:100           |
| Alexa Fluor 555 anti–Rabbit IgG                                                                | Invitrogen (Carlsbad, CA)     | 1:100           |
| Polyclonal Rabbit<br>Anti-Mouse Immunoglobulins/HRP                                            | Dako (Carpinteria, CA)        | 1:1000          |
| Polyclonal Swine<br>Anti-Rabbit Immunoglobulins/HRP                                            | Dako (Carpinteria, CA)        | 1:1000          |
| Polyclonal Rabbit<br>Anti-Goat Immunoglobulins/HRP                                             | Dako (Carpinteria, CA)        | 1:1000          |
| Hoechst 33342                                                                                  | Sigma-Aldrich (St. Louis, MO) | 1:1000          |

| <b>Table 3. Assay ID and Probes Sequence Use for Real-time PCR</b> |                                       |           |                |
|--------------------------------------------------------------------|---------------------------------------|-----------|----------------|
| Gene Name                                                          | Assay ID<br>(Taqman Expression Assay) | UniID     | Product Length |
| GAPDH                                                              | Hs02758991_g1                         | Hs.598320 | 93             |
| p63                                                                | Hs00978344_m1                         | Hs.137569 | 68             |
| K12                                                                | Hs01057907_m1                         | Hs.66739  | 71             |
| Oct4                                                               | Hs00999634_gH                         | Hs.249184 | 64             |
| Nanog                                                              | Hs02387400_g1                         | Hs.635882 | 109            |
| Sox2                                                               | Hs01053049_s1                         | Hs.518438 | 91             |
| Rex1                                                               | Hs00381890_m1                         | Hs.192477 | 109            |
| CD34                                                               | Hs00990734_g1                         | Hs.374990 | 101            |
| N-cadherin                                                         | Hs01032817_m1                         | Hs.113684 | 74             |
| Vimentin                                                           | Hs00185584_m1                         | Hs.455493 | 73             |
